# Supplementary material for: Alleviation of Androgenetic Alopecia with Aqueous Paeonia lactiflora and Poria cocos Extract Intake through Suppressing the Steroid Hormone and Inflammatory Pathway
Source: Pharmaceuticals (Basel). 2021 Nov 5;14(11):1128. doi: 10.3390/ph14111128 (PMC8621879; doi:10.3390/ph14111128)
Supplement: Supplementary file 1 [file pharmaceuticals-14-01128-s001.zip › pharmaceuticals-1423058-supplementary.pdf]

Table S1. Active ingredients of *Paeonia lactiflora* Pallas (PL) and *Poria cocos* Wolf (PC) from Traditional Chinese Medicine system pharmacology database and analysis platform

| Molecular ID | Molecular name                                                                                                                                                            | OB (%) | DL   | Herb |
|--------------|---------------------------------------------------------------------------------------------------------------------------------------------------------------------------|--------|------|------|
| MOL001910    | 11alpha,12alpha-epoxy-3beta-23-dihydroxy-30-norolean-20-en-28,12beta-olide                                                                                                | 64.77  | 0.38 | PL   |
| MOL001918    | paeoniflorgenone                                                                                                                                                          | 87.59  | 0.37 | PL   |
| MOL001919    | (3S,5R,8R,9R,10S,14S)-3,17-dihydroxy-4,4,8,10,14-pentamethyl-2,3,5,6,7,9-hexahydro-1H-cyclopenta[a]phenanthrene-15,16-dione                                               | 43.56  | 0.53 | PL   |
| MOL001921    | lactiflorin                                                                                                                                                               | 49.12  | 0.8  | PL   |
| MOL001924    | paeoniflorin                                                                                                                                                              | 53.87  | 0.79 | PL   |
| MOL001925    | paeoniflorin_qt                                                                                                                                                           | 68.18  | 0.4  | PL   |
| MOL001928    | albiflorin_qt                                                                                                                                                             | 66.64  | 0.33 | PL   |
| MOL001930    | benzoyl paeoniflorin                                                                                                                                                      | 31.27  | 0.75 | PL   |
| MOL000211    | mairin                                                                                                                                                                    | 55.38  | 0.78 | PL   |
| MOL000358    | beta-sitosterol                                                                                                                                                           | 36.91  | 0.75 | PL   |
| MOL000359    | sitosterol                                                                                                                                                                | 36.91  | 0.75 | PL   |
| MOL000422    | kaempferol                                                                                                                                                                | 41.88  | 0.24 | PL   |
| MOL000492    | (+)-catechin                                                                                                                                                              | 54.83  | 0.24 | PL   |
| MOL000273    | (2R)-2-[(3S,5R,10S,13R,14R,16R,17R)-3,16-dihydroxy-4,4,10,13,14-pentamethyl-2,3,5,6,12,15,16,17-octahydro-1H-cyclopenta[a]phenanthren-17-yl]-6-methylhept-5-enoic acid    | 30.93  | 0.81 | PC   |
| MOL000275    | trametenolic acid                                                                                                                                                         | 38.71  | 0.80 | PC   |
| MOL000276    | 7,9(11)-dehydropachymic acid                                                                                                                                              | 35.11  | 0.81 | PC   |
| MOL000279    | cerevisterol                                                                                                                                                              | 37.96  | 0.77 | PC   |
| MOL000280    | (2R)-2-[(3S,5R,10S,13R,14R,16R,17R)-3,16-dihydroxy-4,4,10,13,14-pentamethyl-2,3,5,6,12,15,16,17-octahydro-1H-cyclopenta[a]phenanthren-17-yl]-5-isopropyl-hex-5-enoic acid | 31.07  | 0.82 | PC   |
| MOL000282    | ergosta-7,22E-dien-3beta-ol                                                                                                                                               | 43.51  | 0.72 | PC   |
| MOL000283    | ergosterol peroxide                                                                                                                                                       | 40.36  | 0.81 | PC   |
| MOL000285    | (2R)-2-[(5R,10S,13R,14R,16R,17R)-16-hydroxy-3-keto-4,4,10,13,14-pentamethyl-1,2,5,6,12,15,16,17-octahydrocyclopenta[a]phenanthren-17-yl]-5-isopropyl-hex-5-enoic acid     | 38.26  | 0.82 | PC   |

|           |                                                    |       |      |    |
|-----------|----------------------------------------------------|-------|------|----|
| MOL000289 | pachymic acid                                      | 33.63 | 0.81 | PC |
| MOL000290 | poricoic acid A                                    | 30.61 | 0.76 | PC |
| MOL000291 | poricoic acid B                                    | 30.52 | 0.75 | PC |
| MOL000292 | poricoic acid C                                    | 38.15 | 0.75 | PC |
| MOL000296 | hederagenin                                        | 36.91 | 0.75 | PC |
| MOL000300 | dehydroeburicoic acid                              | 44.17 | 0.83 | PC |
| MOL000287 | 3beta-Hydroxy-24-methylene-8-lanostene-21-oic acid | 38.7  | 0.81 | PC |

---

OB, oral bioavailability; DL, drug-likeness

The higher OB and DL were the better activity as a drug.

Figure S1. Protein-protein interaction network construction diagram for PL, PC and androgenetic alopecia (AGA).

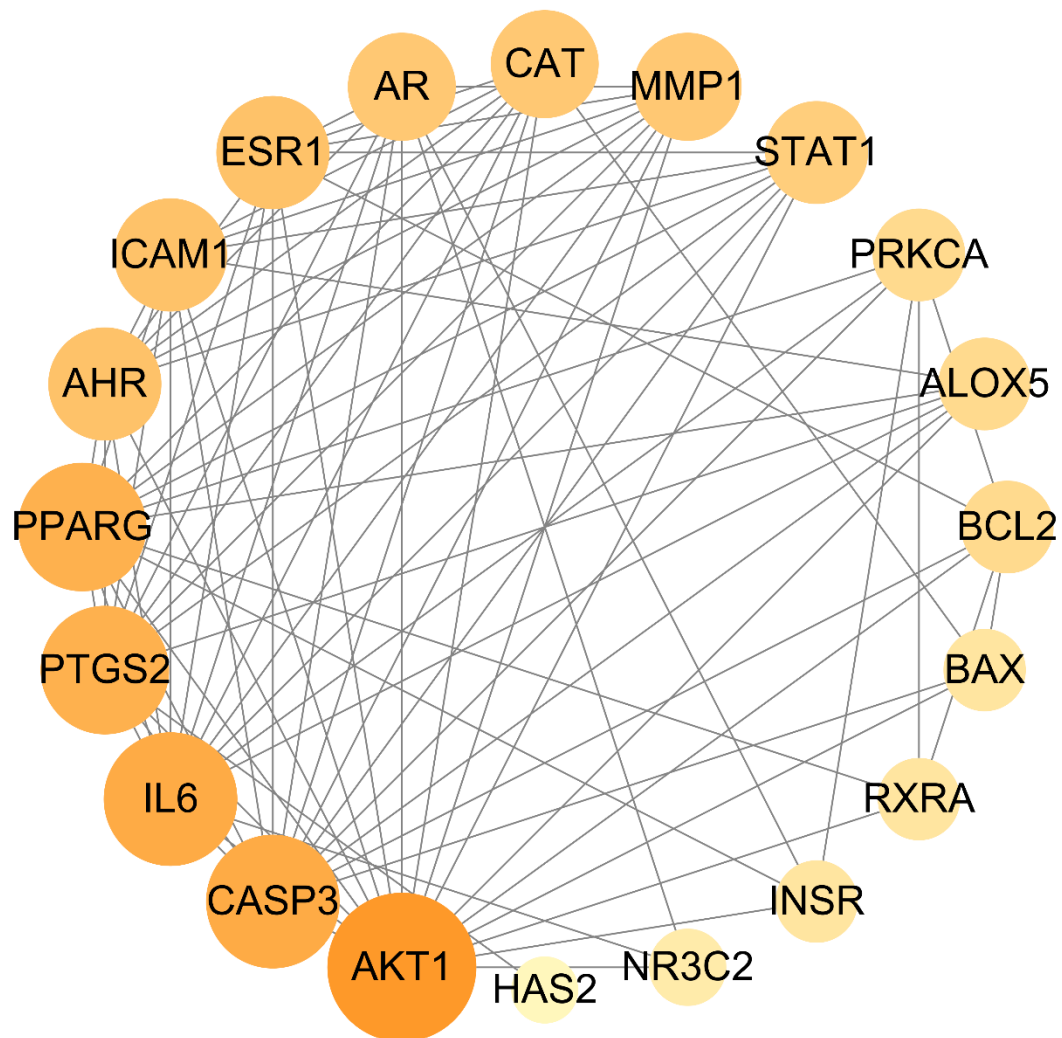

Each circle represents a protein, and lines between proteins represent relationships.

The Larger circles and darker colors were the more related proteins to the AGA and active components.

Figure S2. HPLC chromatogram of *Paeonia lactiflora* pallas and *Poria cocos* Wolf water extracts

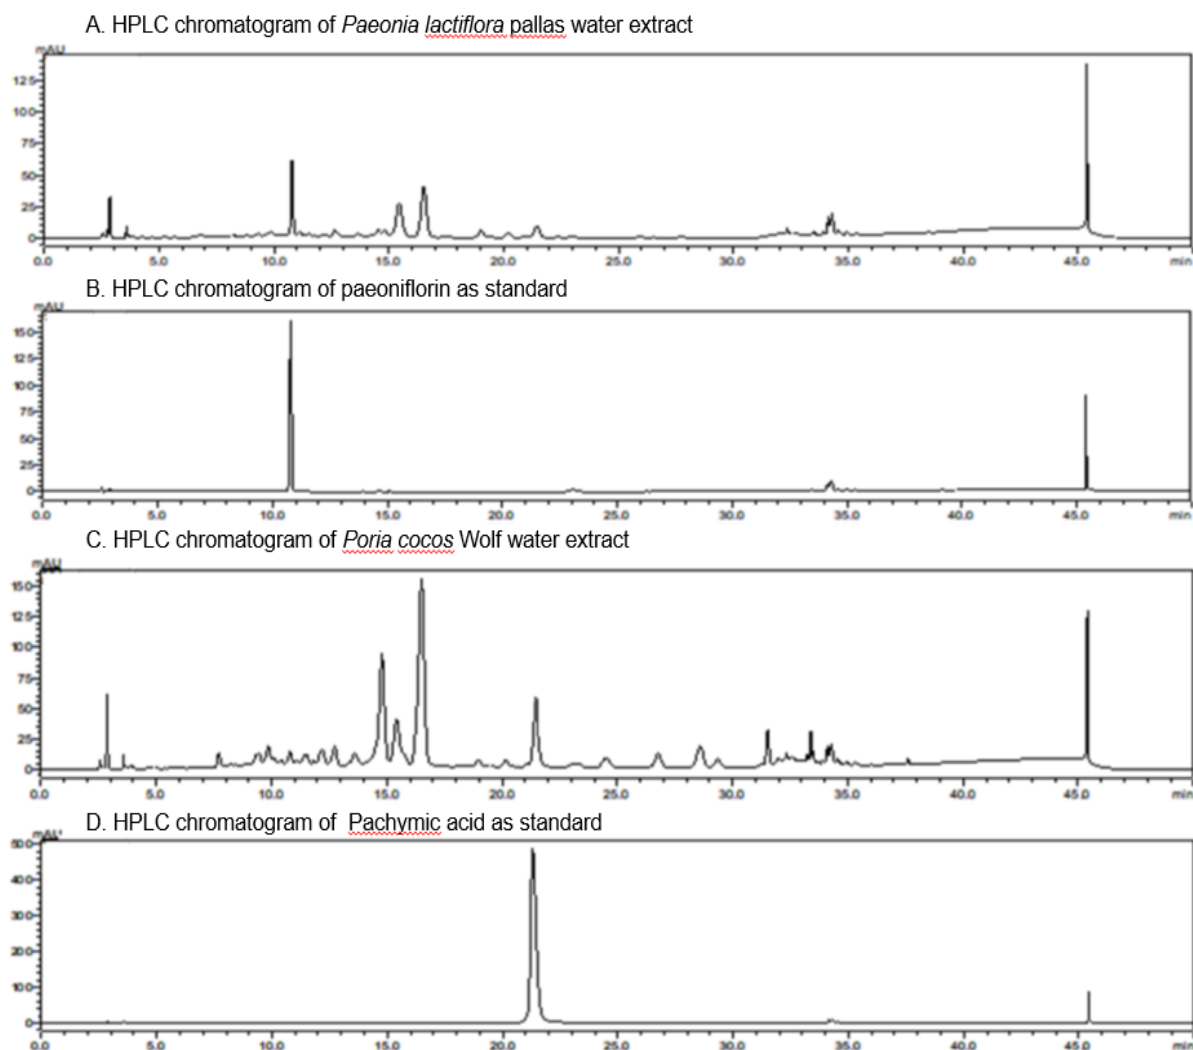

The concentrations of paeoniflorin and pachymic acid were 1 mg/mL in methanol, as stock to dilute them according to the sample concentrations with methanol. HPLC analysis was performed using an Agilent 1100 series HPLC system (Agilent Technologies, Waldbronn, Germany) composed of a quaternary pump (G1315B), vacuum degasser (G1379A), column oven (G1316A), diode-array detector (G1315B), and autosampler (G1313A). Chromatographic data were processed using the ChemStation software. Chromatographic separation was performed using a XD8 C18 column (4.6 mm × 150 mm; inner diameter: 5 μm). The column oven was maintained at 30°C and detection was performed at  $\lambda = 233$  nm for paeoniflorin and 235 nm for pachmic acid. The mobile gradient phase for paeoniflorin was 90:10 → 78:2 for 25 min → 20: 80 for 25 min of distilled water/ acetonitrile while that for pachymic acid was 30:70 → 100% for 25 min → 100% water/acetonitrile with 1% acetic acid for 25 min. The flow rate was 1.0 mL/min and the injection volume was 10 μL.
